# Supplementary material for: Fabrication of Ultra-Fine Ag NPs on TiO2 Thin Films by Alcohol-Assisted Photodeposition Process for Photocatalysis-Related Applications
Source: MDPI journal article supplement (doi:10.3390/ma17061354), 2024-03-15
Supplement: s1 [file s1]

# Supplementary Information

## Fabrication of Ultra-Fine Ag NPs on TiO<sub>2</sub> Thin Films by Alcohol-Assisted Photodeposition Process for Photocatalysis-Related Applications

Salih Veziroglu <sup>1,2\*</sup>

<sup>1</sup> Chair for Multicomponent Materials, Department of Materials Science, Faculty of Engineering, Kiel University (CAU), Kaiserstr. 2, 24143 Kiel, Germany

<sup>2</sup> Kiel Nano, Surface and Interface Science KiNSIS, Kiel University, Christian Albrechts-Platz 4 24118, Kiel, Germany

\*Correspondence: [sve@tf.uni-kiel.de](mailto:sve@tf.uni-kiel.de)

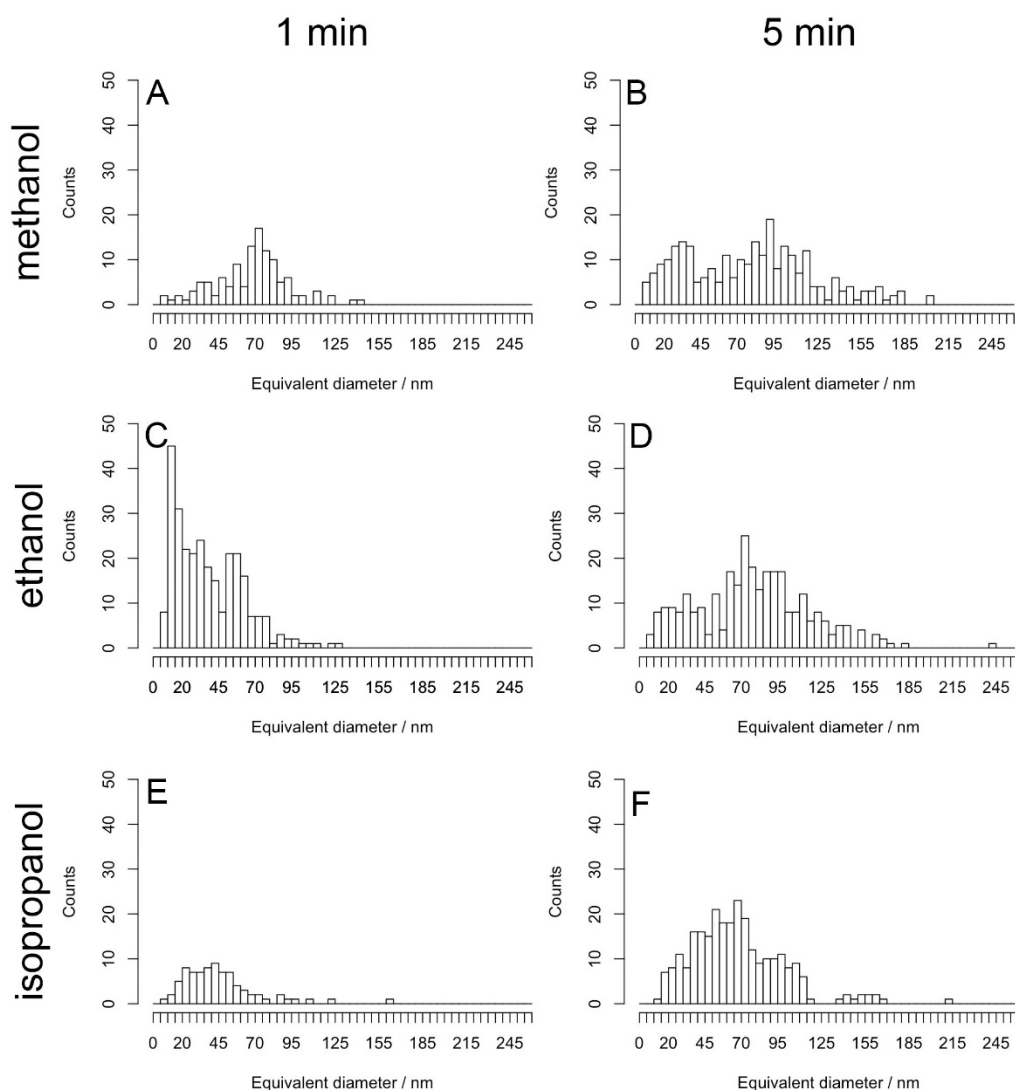

Figure S1. The particle size distribution histogram of Ag NPs on TiO<sub>2</sub> thin film photodeposited in different 25% alcohol media (methanol, ethanol, and 1-propanol) at different UV exposures.

Table S1. The chemical composition of the prepared samples in different 50% alcohol media (methanol, ethanol, and 1-propanol) for 5 minutes.

| Photodeposition Media | Atomic Composition (%) |       |       |       |
|-----------------------|------------------------|-------|-------|-------|
|                       | O 1s                   | C 1s  | Ag 3d | Ti 2p |
| Methanol              | 51.98                  | 24.32 | 4.91  | 18.79 |
| Ethanol               | 53.92                  | 23.26 | 4.47  | 18.35 |
| 1-propanol            | 56.15                  | 21.77 | 2.88  | 19.20 |

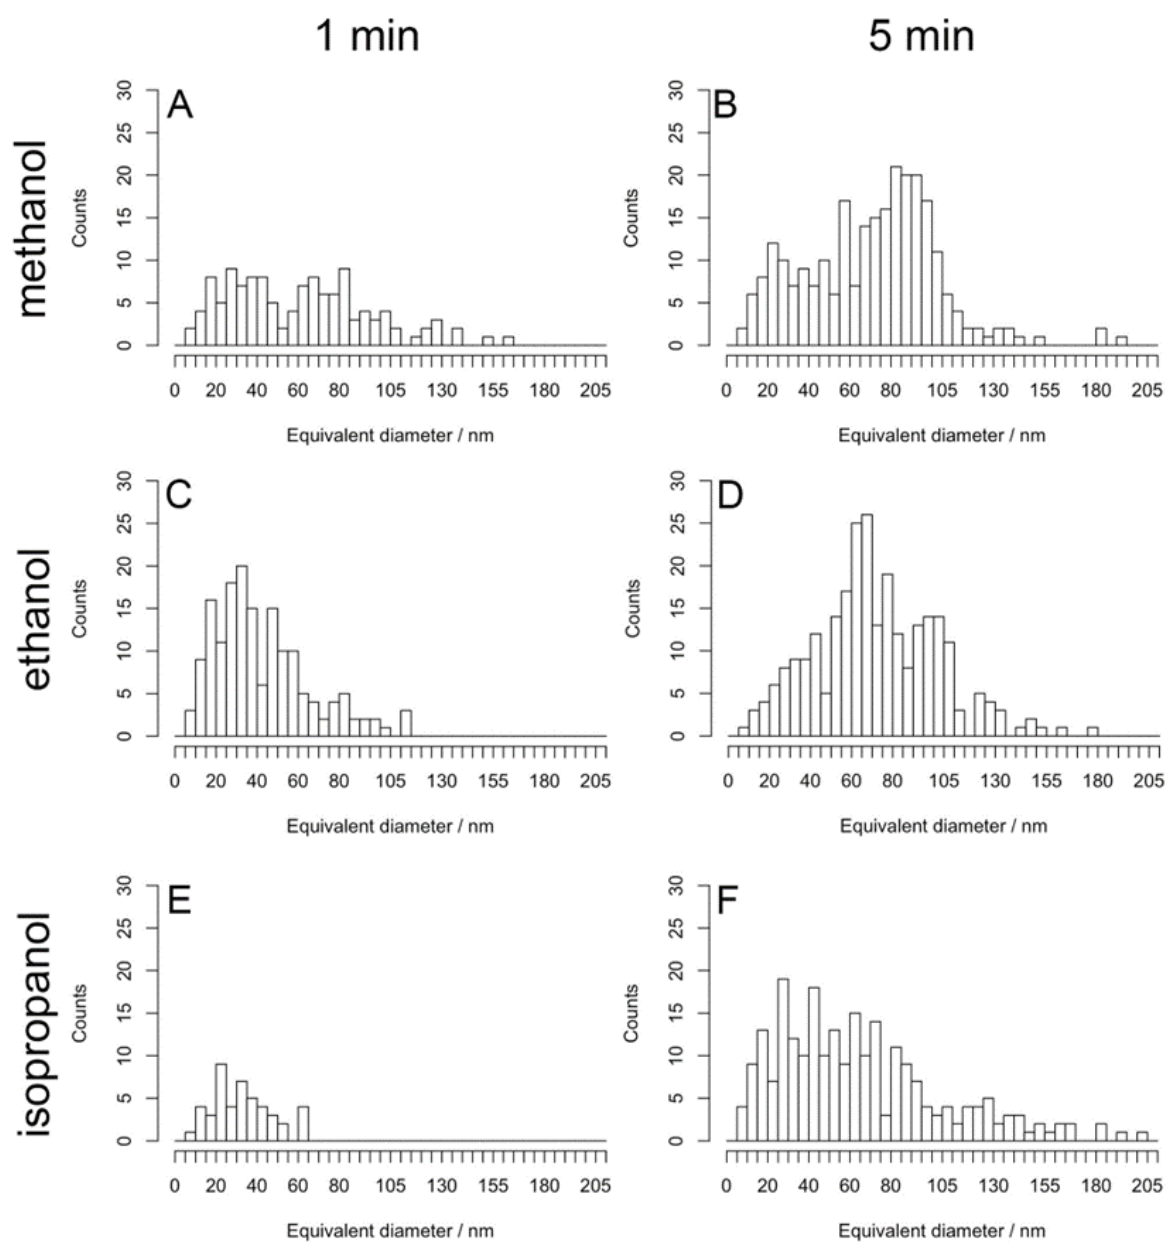

Figure S2. The particle size distribution histogram of Ag NPs on TiO<sub>2</sub> thin film photodeposited in different 50% alcohol media (methanol, ethanol, and 1-propanol) at different UV exposures.

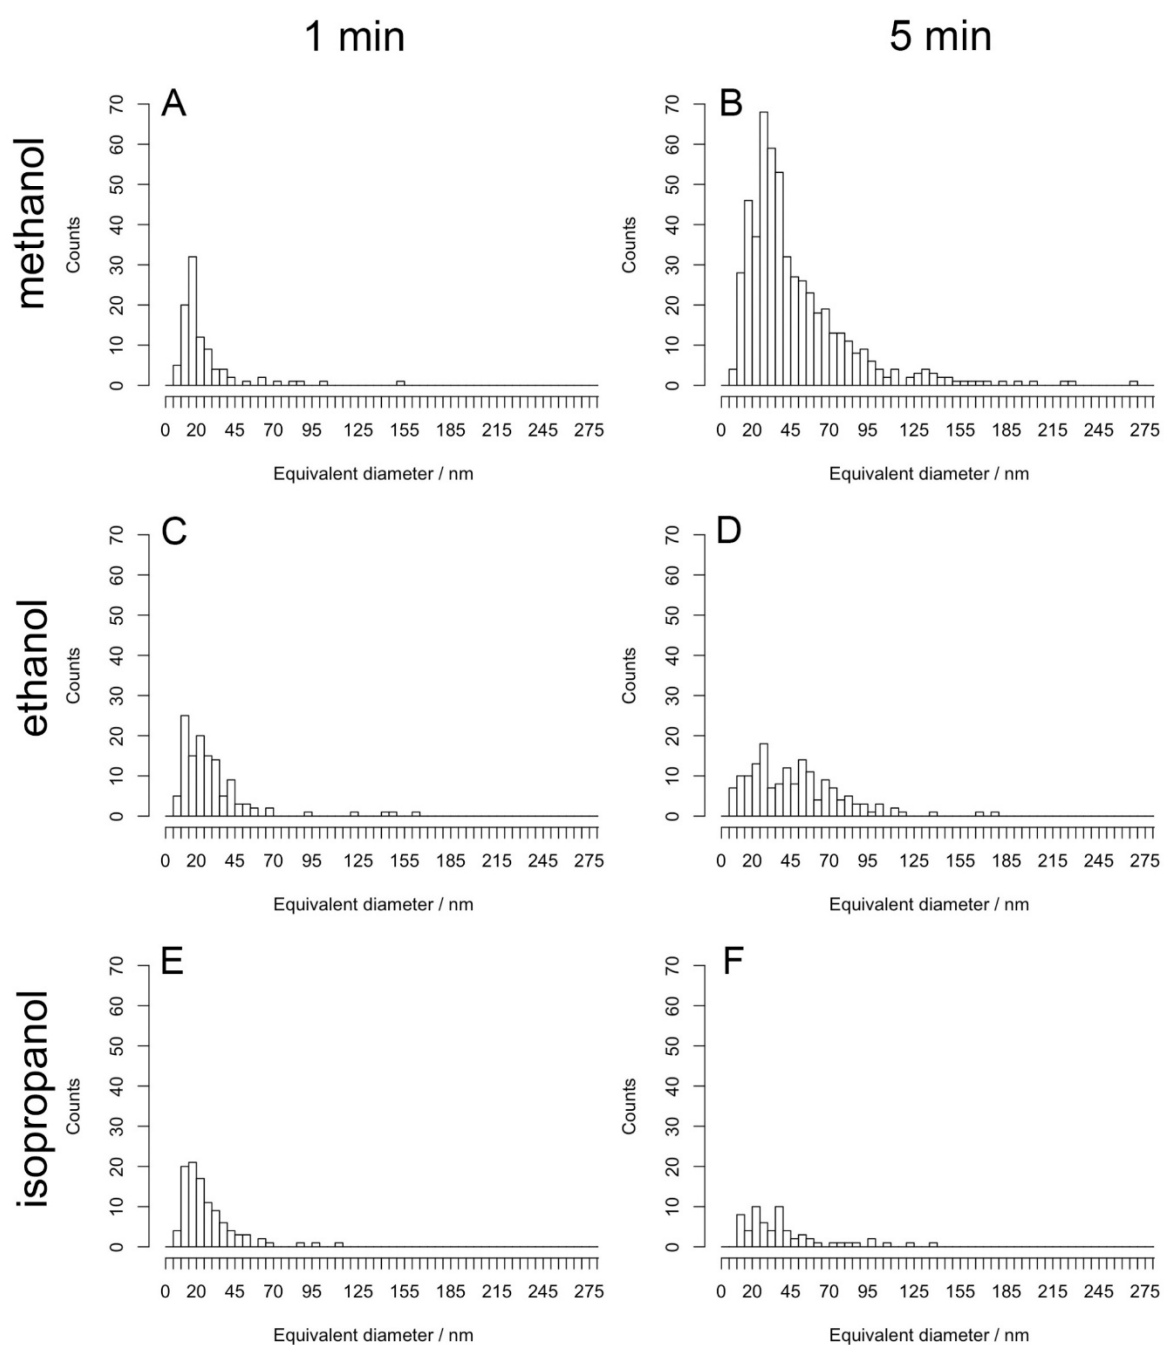

Figure S3. The particle size distribution histogram of Ag NPs on TiO<sub>2</sub> thin film photodeposited in different 100% alcohol media (methanol, ethanol, and 1-propanol) at different UV exposures.
